# Supplementary material for: Enlarged perivascular spaces and hemorrhagic transformation after acute ischemic stroke
Source: PubMed Central journal article supplement — Ann Transl Med. 2021 Jul;9(14):1126. doi: 10.21037/atm-21-1276 (PMC8350705; doi:10.21037/atm-21-1276), 2021-07
Supplement: atm-09-14-1126-dss.pdf [file atm-09-14-1126-dss.pdf]

## Data Sharing Statement

|                     |                                                                                                                                                     |                                                                                                                                            |
|---------------------|-----------------------------------------------------------------------------------------------------------------------------------------------------|--------------------------------------------------------------------------------------------------------------------------------------------|
| <b>Article Info</b> | https://dx.doi.org/10.21037/atm-21-1276                                                                                                             |                                                                                                                                            |
| <b>Item</b>         | <b>Question</b>                                                                                                                                     | <b>Authors' Response<br/>(place "-" if not applicable)</b>                                                                                 |
| 1                   | Would you like to share data collected for your study to others?                                                                                    | Yes.                                                                                                                                       |
| 2                   | If not, would you like to share the reason for your decision?                                                                                       | -                                                                                                                                          |
| 3                   | What data in particular will be shared?                                                                                                             | All data, generated or used during the study are available from the corresponding author by request.                                       |
| 4                   | Any other documents will be shared? Such as study protocol, statistical analysis plan, informed consent form, clinical study report, analytic code. | No.                                                                                                                                        |
| 5                   | When will data availability begin?                                                                                                                  | From the publication date.                                                                                                                 |
| 6                   | When will data availability end?                                                                                                                    | Two years within the publication date.                                                                                                     |
| 7                   | To whom will you share the data?                                                                                                                    | Neurologists and radiologists who are interested in enlarged perivascular spaces and hemorrhagic transformation.                           |
| 8                   | For what type of analysis or purpose?                                                                                                               | For analysis to investigate the relationship between enlarged perivascular spaces and intracranial hemorrhage after acute ischemic stroke. |
| 9                   | How or where can the data/documents be obtained?                                                                                                    | Emails could be sent to the address below to obtain the shared data:<br><a href="mailto:wypmh@hotmail.com">wypmh@hotmail.com</a>           |
| 10                  | Any other restrictions?                                                                                                                             | We may balance the potential benefits and risks for each request and then provide the data that could be shared.                           |
