# Supplementary material for: Enlarged perivascular spaces and hemorrhagic transformation after acute ischemic stroke
Source: PubMed Central journal article supplement — Ann Transl Med. 2021 Jul;9(14):1126. doi: 10.21037/atm-21-1276 (PMC8350705; doi:10.21037/atm-21-1276), 2021-07
Supplement: atm-09-14-1126-supplementary.pdf [file atm-09-14-1126-supplementary.pdf]

**Table S1** Spearman's rank correlation coefficient among EPVS, lacunes, and WMH

|         | BG-EPVS | CS-EPVS |
|---------|---------|---------|
| BG-EPVS | -       | 0.243*  |
| Lacunes | 0.237*  | 0.035   |
| cWMH    | 0.526*  | 0.065   |
| PWMH    | 0.515*  | 0.024   |
| DWMH    | 0.450*  | 0.086   |

BG-EPVS: basal ganglia enlarged perivascular spaces; CS-EPVS: centrum semiovale enlarged perivascular spaces; cWMH: total cerebral white matter hyperintensity; PWMH: periventricular white matter hyperintensity; DWMH: deep white matter hyperintensity. \*P<0.001.

**Table S2** Imaging characteristics of patients with and without PH

| Imaging characteristics           | Without PHN=456 | With PHN=38 | P     |
|-----------------------------------|-----------------|-------------|-------|
| Total EPVS, median (IQR)          | 4 (3-5)         | 4 (3-5)     | 0.407 |
| BG-EPVS, median (IQR)             | 1 (1-2)         | 1 (1-2)     | 0.660 |
| Moderate to severe BG-EPVS, n (%) | 223 (48.9)      | 16 (42.1)   | 0.420 |
| CS-EPVS, median (IQR)             | 2 (2-3)         | 2 (2-3)     | 0.324 |
| Moderate to severe CS-EPVS, n (%) | 401 (87.9)      | 34 (89.5)   | 0.984 |
| Lacunes, n (%)                    | 89 (19.5)       | 6 (15.8)    | 0.575 |
| PWMH, median (IQR)                | 1 (0-2)         | 1 (0-1)     | 0.583 |
| Extensive PWMH, n (%)             | 38 (8.3)        | 1 (2.6)     | 0.348 |
| DWMH, median (IQR)                | 1 (0-1)         | 1 (0-1)     | 0.443 |
| Extensive DWMH, n (%)             | 84 (18.4)       | 6 (15.8)    | 0.686 |
| cWMH, median (IQR)                |                 |             | 0.354 |
| No cWMH, n (%)                    | 119 (26.1)      | 9 (23.7)    |       |
| Mild cWMH, n (%)                  | 206 (45.2)      | 22 (57.9)   |       |
| Moderate cWMH, n (%)              | 90 (19.7)       | 6 (15.8)    |       |
| Severe cWMH, n (%)                | 41 (9.0)        | 1 (2.6)     |       |
| Total CSVD burden, median (IQR)   | 1 (0-1)         | 0 (0-1)     | 0.298 |
| Score 0, n (%)                    | 199 (43.6)      | 20 (52.6)   | 0.627 |
| Score 1, n (%)                    | 146 (32.0)      | 11 (28.9)   |       |
| Score 2, n (%)                    | 79 (17.3)       | 4 (10.5)    |       |
| Score 3, n (%)                    | 32 (7.0)        | 3 (7.9)     |       |

PH: parenchymal hematoma; BG-EPVS: basal ganglia enlarged perivascular spaces; CS-EPVS: centrum semiovale enlarged perivascular spaces; PWMH: periventricular white matter hyperintensity; DWMH: deep white matter hyperintensity; cWMH: total cerebral white matter hyperintensity; CSVD: cerebral small vessel disease; IQR: interquartile range.

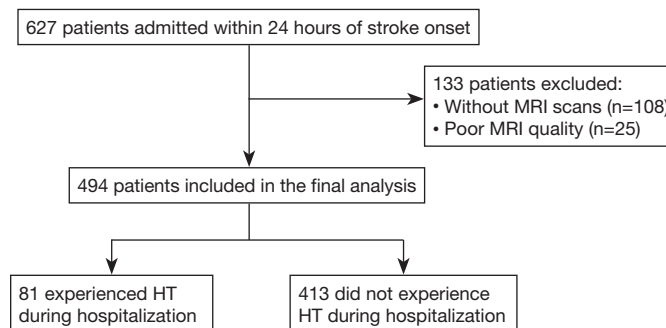

**Figure S1** Flowchart of patients' enrollment.
